# Supplementary material for: Tyrosyl-tRNA synthetase has a noncanonical function in actin bundling
Source: PubMed Central journal article supplement (PMC9995517; doi:10.1038/s41467-023-35908-3), 2023-03-08
Supplement: 41467_2023_35908_MOESM3_ESM.pdf [file 41467_2023_35908_MOESM3_ESM.pdf]

## Description of Additional Supplementary Files

File Name: Supplementary Data 1

Description: X-chromosome-associated *EP* lines used for a retinal degeneration screen in YARS1<sup>E196K</sup> *Drosophila* model.

File Name: Supplementary Data 2

Description: Table of mass-spectrometry data in FLAG-YARS1WT expressing HEK293 cells.

File Name: Supplementary Movie 1

Description: TIRF movies of unanchored actin filaments in the presence of YARS1 proteins.

File Name: Supplementary Movie 2

Description: YARS1<sup>WT</sup> and F-actin at protrusions in HeLa cells.
